# Supplementary material for: Phenotypical-genetic virulence and resistance in atypical avian pathogenic Escherichia coli
Source: Int Microbiol. 2026 Apr 2;29(5):631–40. doi: 10.1007/s10123-026-00811-6 (PMC13260093; doi:10.1007/s10123-026-00811-6)
Supplement: Supplementary file 2 — Supplementary Material 2 [file 10123_2026_811_MOESM2_ESM.xlsx]

## Sheet: 28
	1- Aminoglycosides		2 - Cephalosporins		3 - Fenicóis		4 - Fluoroquinolones		5 - Folate pathway inhibitors	6 - Nitrofurans	7 - Penicillins		8 - Quinolones	9 - Rifamycins	10 - Tetracyclines		11 - Carbapenems
Isolate	Gentamicin	Amikacin	Cephalexin	Cefotaxime	Chloramphenicol	Florfenicol	Ciprofloxacin	Enrofloxacin	Sulfamethoxazole–trimethoprim	Nitrofurantoin	Ampicillin	Oxacillin	Nalidixic acid	Rifampicin	Tetracycline	Doxycycline	Ertapenem	Imipenem	Meropenem
12377/19	S	S	R	R	S	S	S	S	R	S	R	R	R	R	R	R	S	S	S
12853/21	S	S	R	S	S	S	S	S	S	S	R	R	S	R	S	S	S	S	S
17640/19	S	S	R	S	S	S	R	R	R	S	I	I	R	R	R	R	S	S	S
18037/19	S	S	R	S	S	S	S	R	S	S	R	I	S	R	R	R	I	S	S
23187/18	S	S	S	S	S	S	S	S	S	S	S	S	R	R	S	S	S	S	S
26514/20	S	S	R	R	S	S	I	I	R	S	R	R	R	R	R	R	S	S	S
26884/20	S	S	S	S	S	S	S	S	S	S	S	S	S	R	S	S	S	S	S
36170/21	S	S	S	S	S	S	S	S	S	S	S	S	S	R	S	I	S	S	S
36803/21	S	S	S	S	S	S	S	S	S	S	R	R	S	R	S	R	I	S	S
388341/18	S	S	S	S	S	S	S	S	S	S	S	S	S	R	S	S	S	S	S
38860/22	S	S	R	S	S	S	S	S	R	S	R	R	R	R	R	R	R	S	I
41582/22	S	S	R	S	S	S	S	S	R	S	R	R	I	R	R	R	I	S	S
43951/19	S	S	S	S	S	S	R	R	S	S	R	R	R	S	R	R	S	S	S
45860/20	S	S	R	S	R	R	S	S	S	S	R	R	S	R	R	R	S	S	S
57093/22	S	S	S	S	S	S	R	S	S	S	S	S	S	R	R	S	I	S	S
58575/22	S	S	R	R	S	S	S	S	S	S	R	R	S	R	S	S	S	S	S
59847/20	S	S	S	S	S	S	S	S	S	S	S	S	R	R	R	R	S	S	S
62697-972/20	S	S	S	S	R	R	S	S	I	S	R	R	S	R	R	R	S	S	S
64047/18	I	S	R	S	S	S	S	S	S	S	R	R	R	R	S	S	I	S	S
66015/22	S	S	I	S	S	S	R	R	R	S	R	R	I	R	R	R	R	S	S
70315/22	S	S	I	S	S	S	S	S	S	S	R	R	S	R	R	R	I	S	S
70788/20	S	S	R	S	S	S	S	S	I	R	R	R	S	R	S	R	I	S	I
71622/19	S	S	R	S	S	S	R	R	R	S	S	R	R	R	R	R	S	S	S
73328/18	S	I	R	S	R	S	I	I	R	S	R	R	R	R	R	R	S	S	S
76306/21	S	S	R	S	S	S	I	I	S	S	S	R	R	R	S	I	R	S	S
81480/22	S	S	S	S	S	S	S	S	S	S	R	R	S	R	I	R	I	S	I
85671/21	S	S	I	S	S	S	S	S	R	S	S	S	S	R	R	I	S	S	S
9878/19	S	S	R	S	S	S	S	S	S	S	R	R	R	R	R	R	S	S	S
